# Supplementary material
Source: PubMed Central journal article supplement (PMC3808142)
Supplement: mt2013137x1.pdf [file mt2013137x1.pdf]

Supplementary Figure S1A

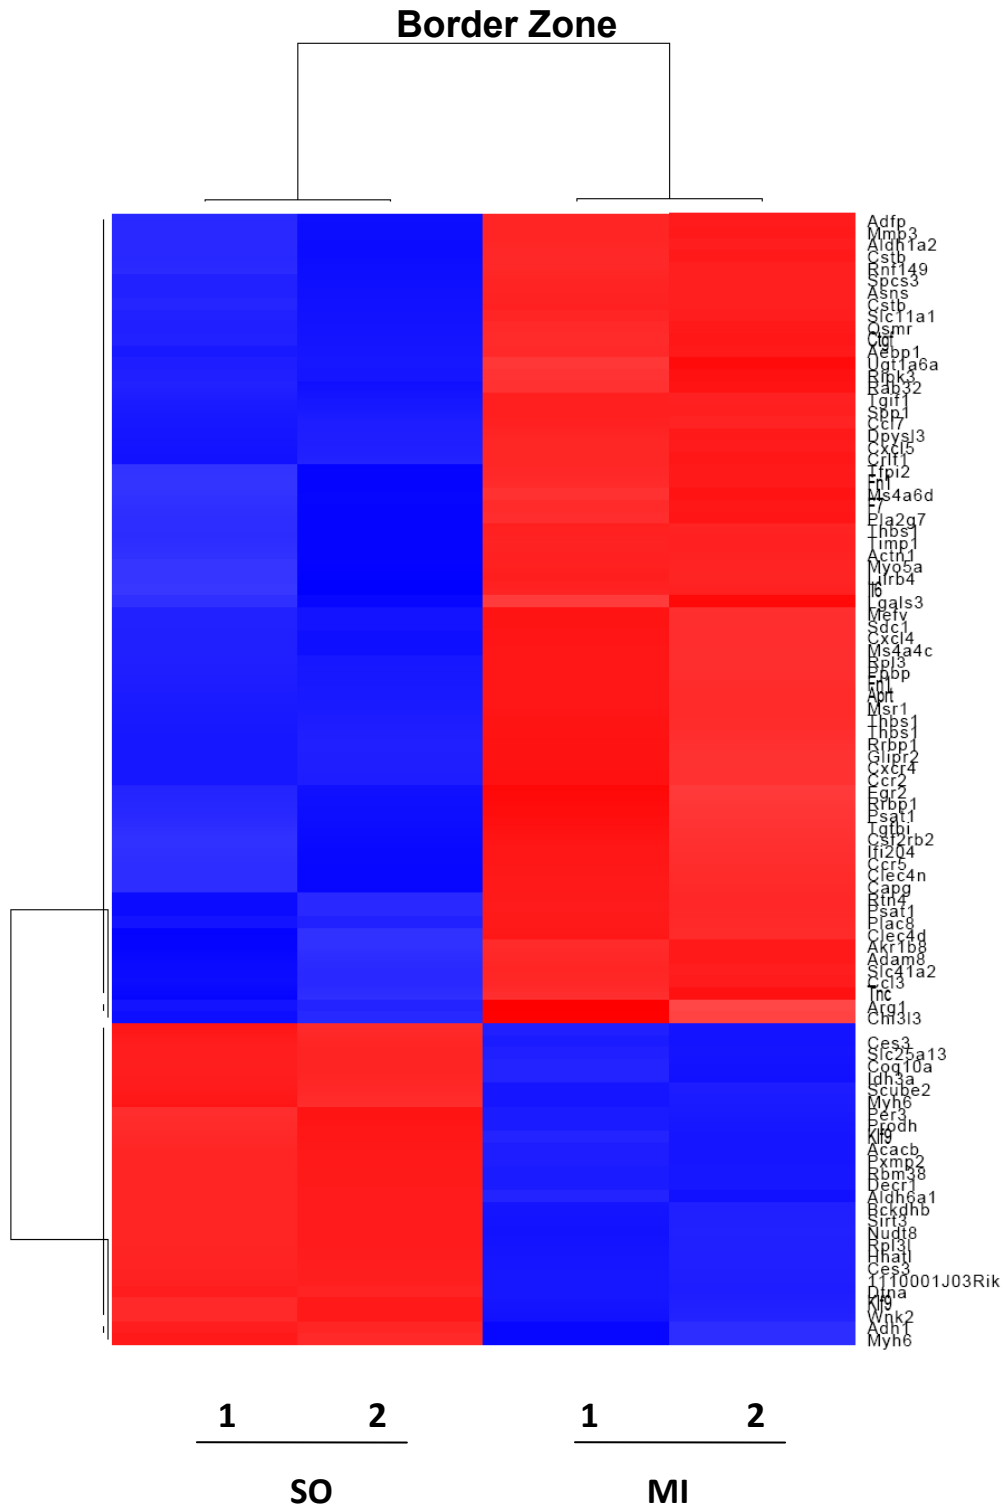

Supplementary Figure S1B

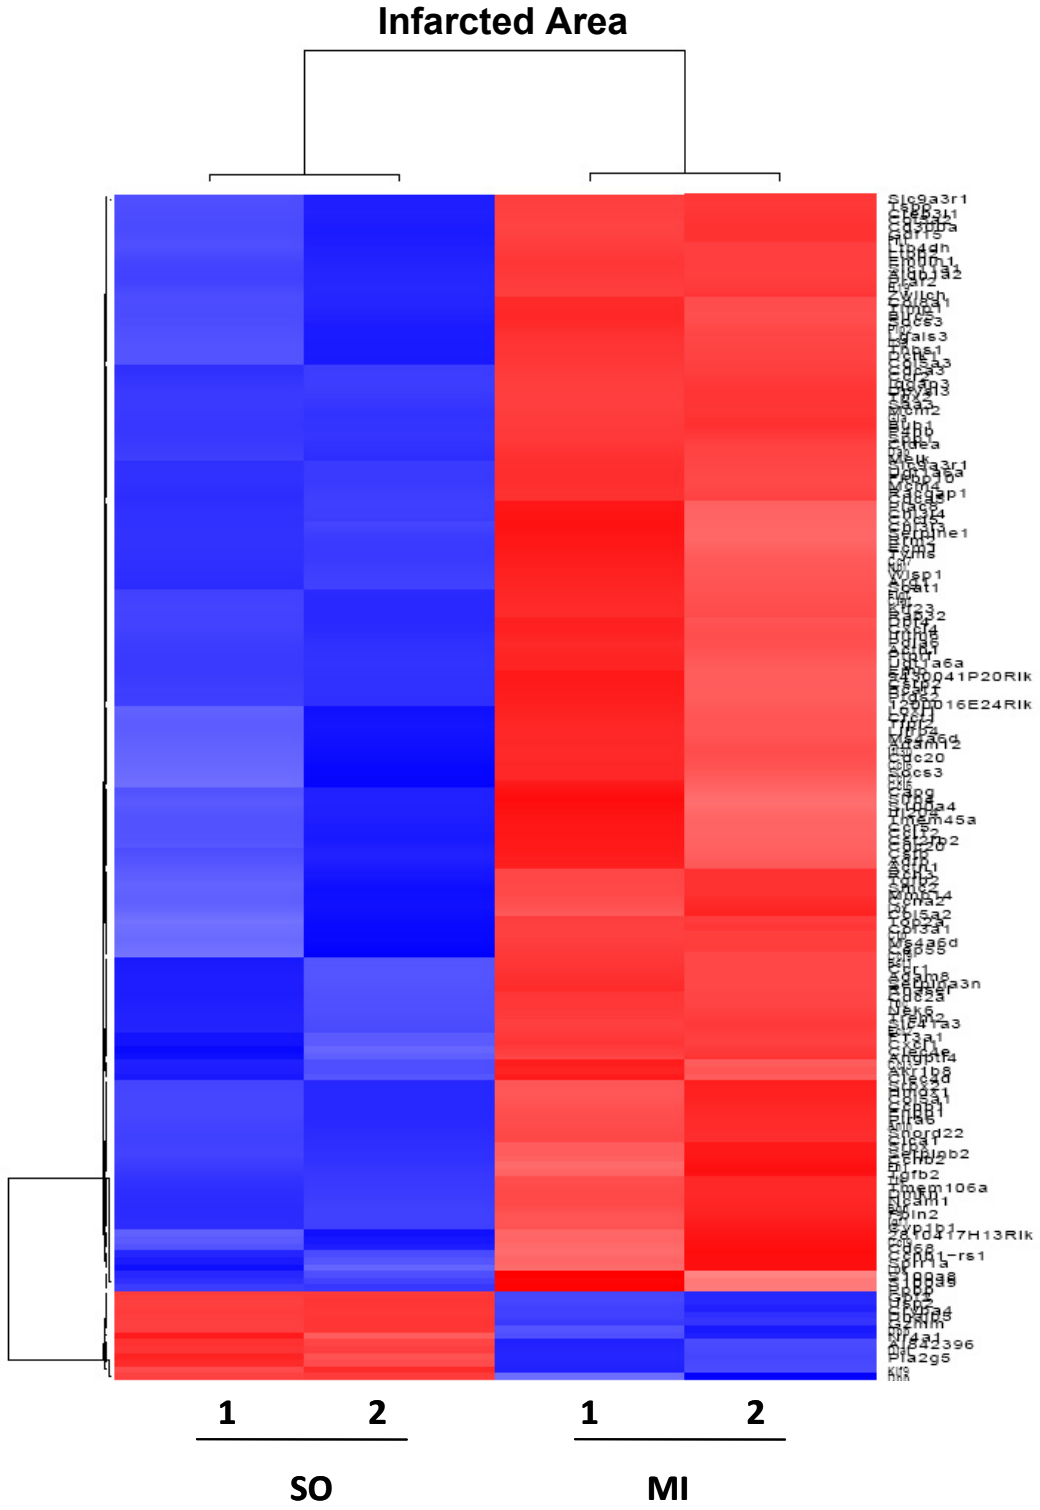

# Supplementary Figure S1C

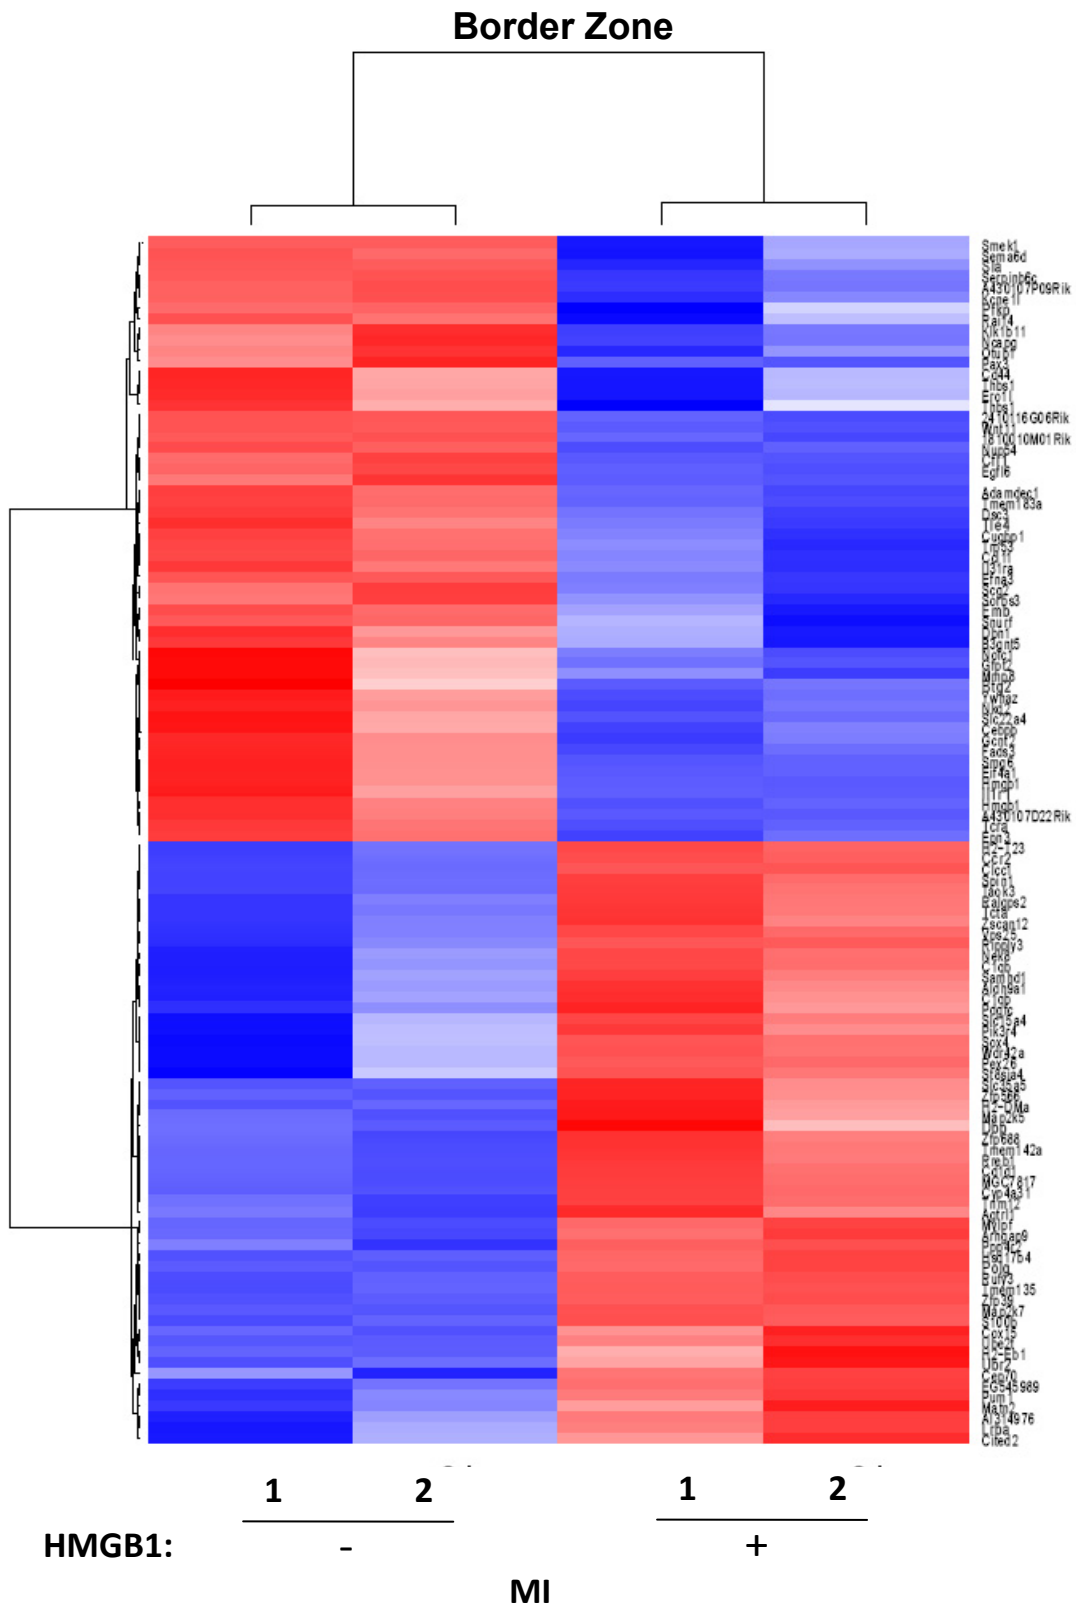

Supplementary Figure S1D

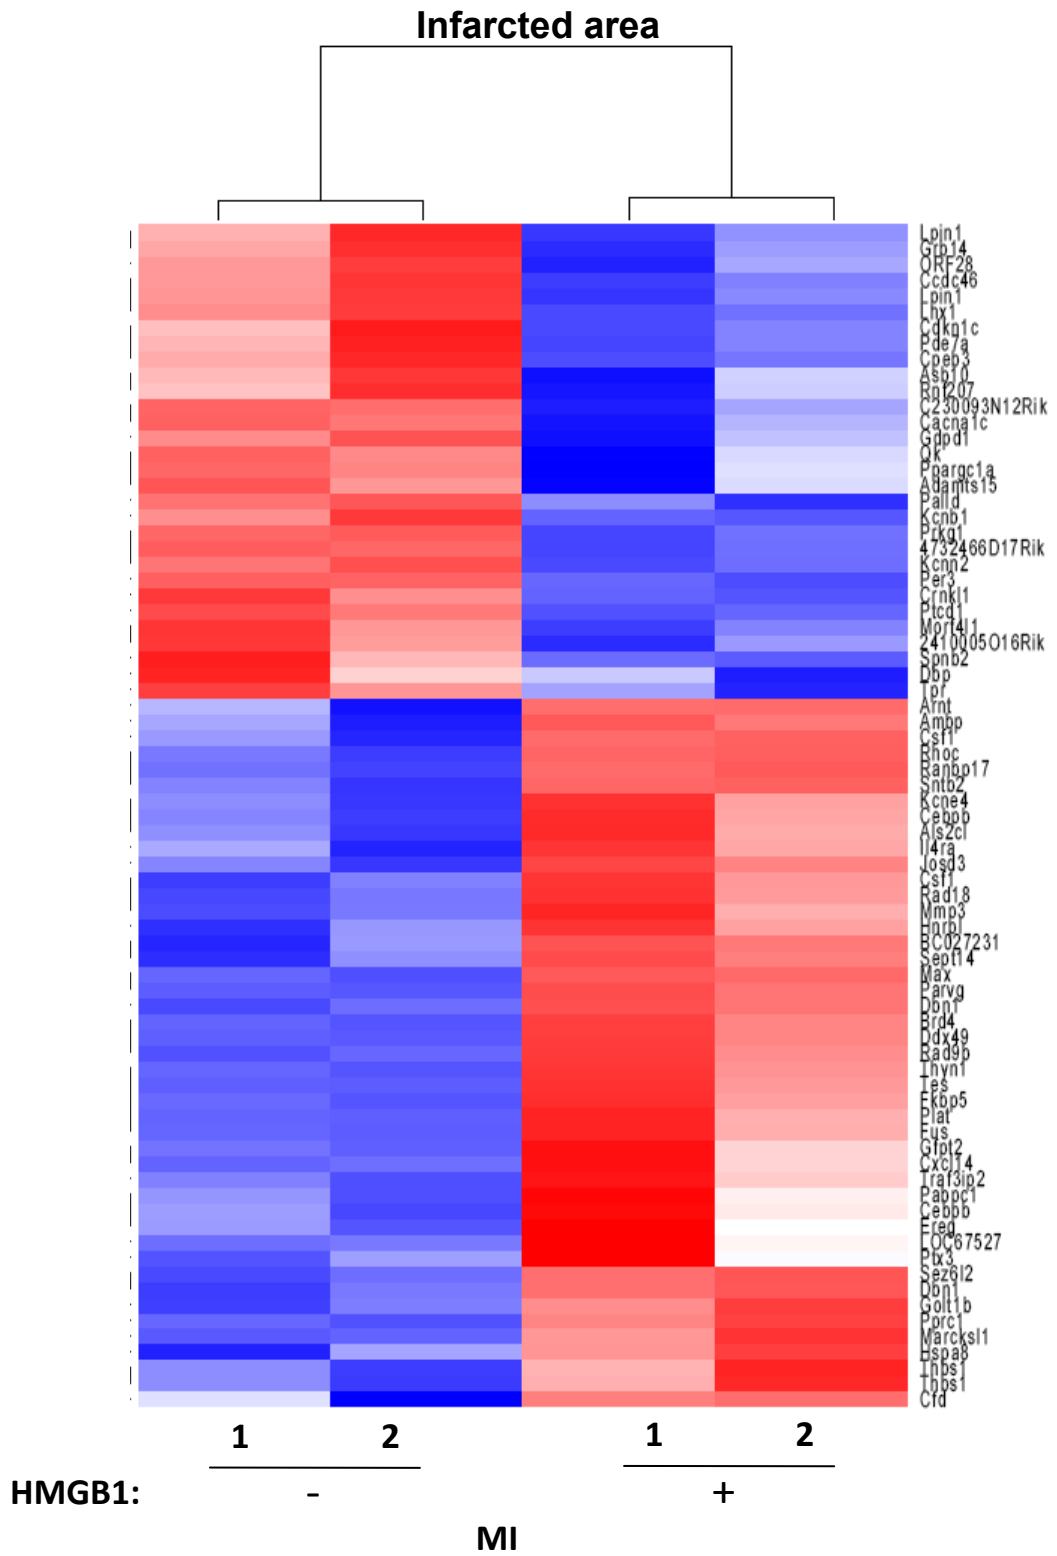

## Supplementary Figure S2

**A**

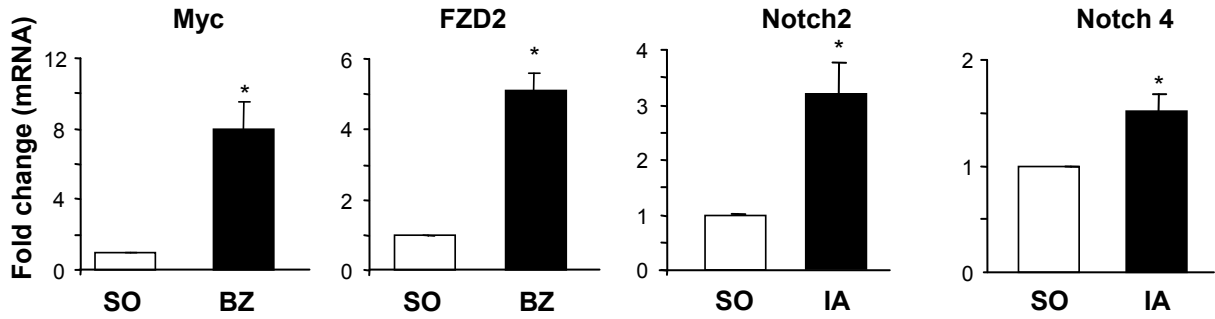

**B**

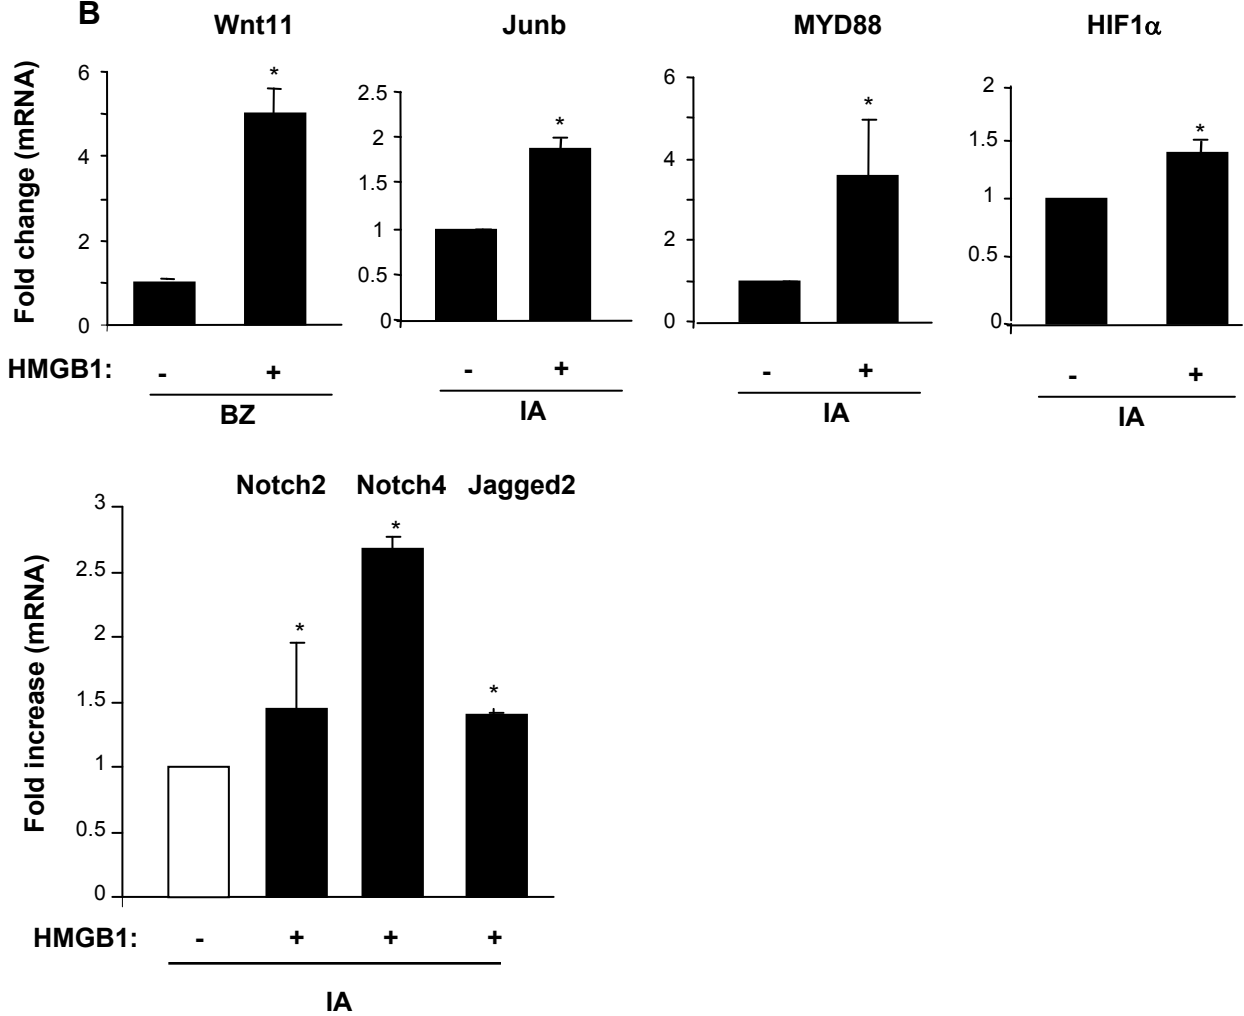

## Supplementary Figure S3

### Cell cycle

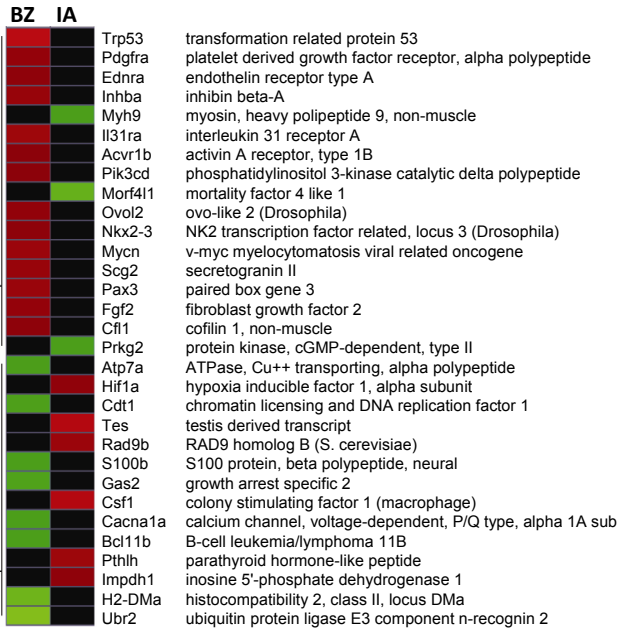

### Gene expression

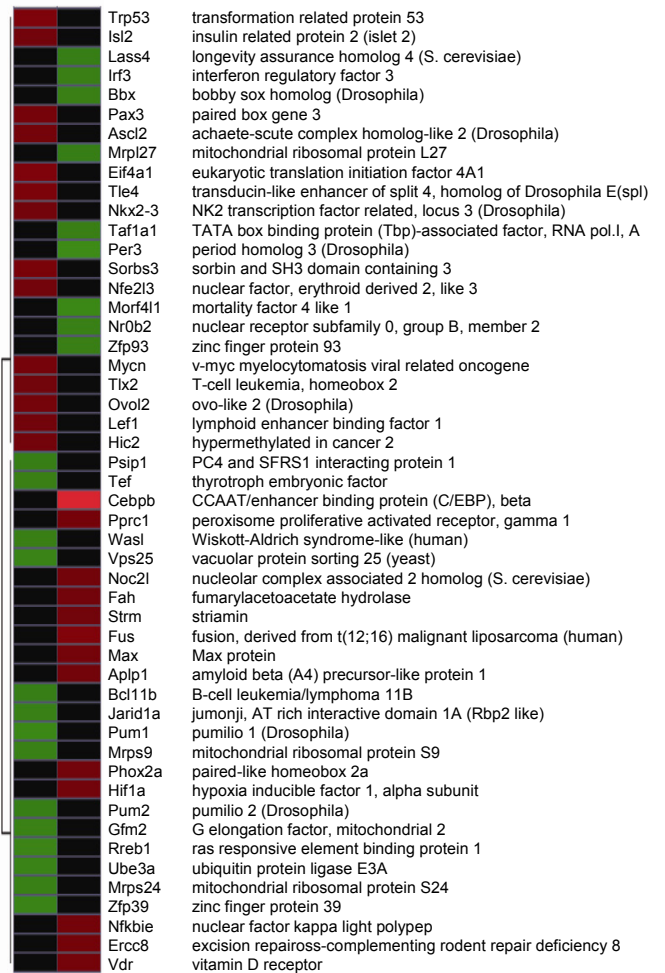

### Tissue and cell development

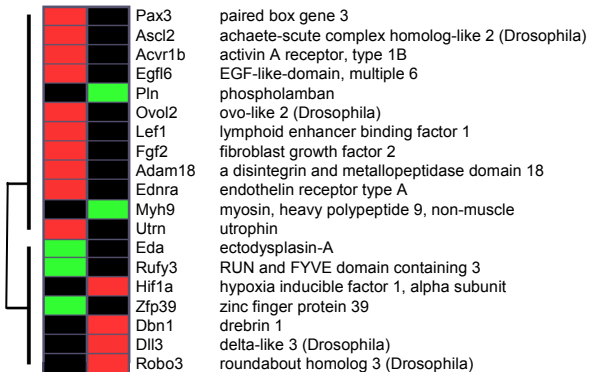

### Supplementary Figure S4

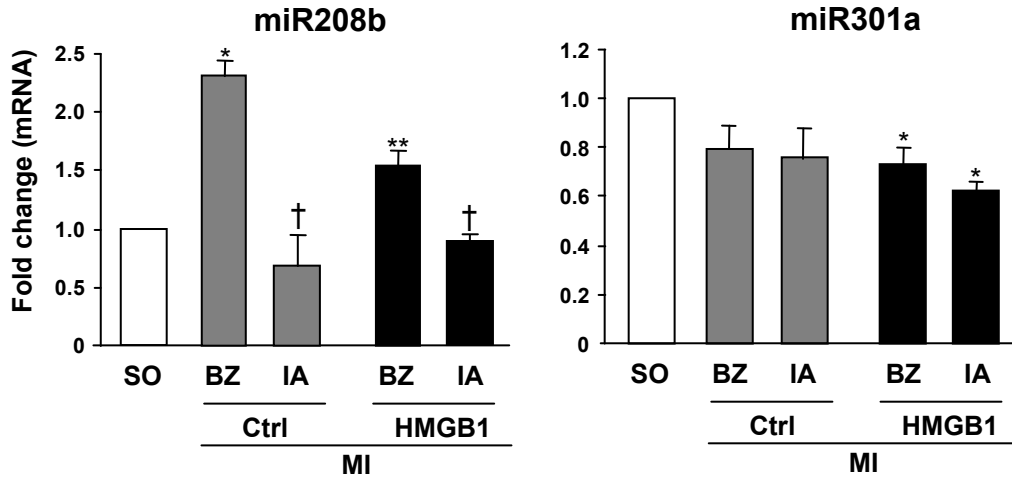

## Supplementary Table S1

| Accession No. | Gene     | Forward Primer            | Reverse primer           |
|---------------|----------|---------------------------|--------------------------|
| NM_010849     | Myc      | AGCTGAAGCGCAGCTTTTTT      | GGCCTTTTCGTTGTTTTCCA     |
| NM_020510     | Fzd2     | TCCGCATCCGCACCAT          | CCATGAGCCTCTCCAGCTTCT    |
| NM_010928     | Notch2   | AAATGAACCAAAGGTGTTCAGTGTT | CATTCAACGCGCTGGTAAA      |
| U43691        | Notch4   | TGTGGGCGAATTGGGTGTA       | GCAGTAGATAGCAGAGGCTCCTTT |
| NM_009519     | Wnt11    | TTCCAGGCTGCTCCAAGAA       | ATTCCAGAAAGCCGGTCTTTC    |
| NM_010851     | Myd88    | TGGGCTACATGAGAGCCTACCT    | ACAGTGCCCCCAGATTTTCC     |
| NM_008416     | JunB     | CAGCTCAAGCAGAAGGTCATGA    | GGGCAAGGGAGGCTCTCA       |
| NM_010588     | Jagged-1 | CTTTCACCCTCATCGTGA        | TCAGCAGCTCCTCATCTGG      |

| Gene/miR       | Assay ID       |
|----------------|----------------|
| TBX5           | Mm00803521_m1  |
| Tie-2          | Mm00443242_m1; |
| sm-MHC         | Mm00443013_m1  |
| GAPDH          | Mm99999915_g1  |
| Hes1           | Mm01342805_m1  |
| Hey1           | Mm00468865_m1  |
| Jagged-1       | Mm00496902_m1  |
| Notch1         | Mm00435245_m1  |
| miR-16         | 000391         |
| hsa-mir-208b   | 002290         |
| hsa-mir-301a   | 000528         |
| hsa-mir-483-5p | 002338         |
| mmu-mir-675-5p | 001940         |
| hsa-mir-711    | 001646         |
| mmu-mir-882    | 002610         |
| mmu-mir-204    | 000508         |



## Supplementary Table S6

### PUTATIVE TARGETS\_MiROnTop

| <b>miR-208b</b> | <b>miR-301a</b> |
|-----------------|-----------------|
| ADAM22          | CSF1            |
| ADAMDEC1        | DDX49           |
| ATP8B2          | ERCC8           |
| CHIC1           | GNG12           |
| EDNRA           | GOLT1B          |
| EMB             | HIF1A           |
| EPN3            | IMPDH1          |
| GUCA2B          | MBP             |
| HIC2            | PLAT            |
| PDLIM5          | PTHLH           |
| SLA             | RANBP17         |
| SLC1A2          | SCD1            |
| SLC22A4         | SFRS2           |
| SLC4A8          | SLC12A2         |
| TLE4            | SNTB2           |
| TRP53           | TES             |
| YWHAZ           | UBE2G2          |
|                 | VPS39           |

## SUPPLEMENTARY FIGURE LEGENDS

**Supplementary Figure S1. Gene expression analysis in control and infarcted hearts.**

Hierarchical clustering of differentially expressed genes shown in Figures 1 and 3 in the main text.

**Supplementary Figure S2.** Real time PCR validation of gene chip microarray expression analysis in the BZ and in the IA in the absence (A) and in the presence of HMGB1 treatment (B). Data were normalized to GAPDH, a housekeeping gene and represent means $\pm$ SE; (n=4, p<0.05).

**Supplementary Figure S3.** Clustered expression pattern of genes in HMGB1-treated hearts, within the indicated functional groups. Differentially expressed genes were categorized on the basis of known functions. Each row represents the expression of a single gene and columns 1 and 2 correspond to a sample pool of 3 BZ and IA of HMGB1-treated hearts. Expression levels are represented by a color tag, with red representing the highest levels and green the lowest levels of expression.

**Supplementary Figure S4.** Real time PCR validation of miR-208b and miR-301a expression in the indicated region of the heart after MI and HMGB1 treatment. Data were normalized to miR-16 expression and represent means $\pm$ SE; (n=3, \*p<0.01 vs SO; \*\*p<0.05 vs BZ Ctrl; †p<0.001 vs BZ).

**Supplementary Table S1.** mRNA and miRNA probe list used in validation studies.

**Supplementary Table S2.** mRNA array results in the border zone and in the infarcted area of untreated and HMGB1-treated hearts.

**Supplementary Table S3.** IPA of expressed genes in untreated hearts.

**Supplementary Table S4.** IPA of expressed genes in HMGB1-treated hearts.

**Supplementary Table S5.** List of modulated miRNA in the BZ and IA of untreated and HMGB1-treated hearts.

**Supplementary Table S6.** List of putative miR208b and miR301a targets.

## SUPPLEMENTARY MATERIALS AND METHODS

### **miRNA and mRNA isolation and quantification.**

Quality of RNA was checked using the Agilent 2100 Bioanalyzer and nanodrop 1000. mRNAs and miRNA levels were analyzed using the SYBR-GREEN qPCR method (5 ng/assay, Qiagen) and the TaqMan quantitative real-time PCR (qPCR) method (1 ng/assay), respectively. Then both mRNA and miRNA were quantified with ABI Prism 7000 SDS (Applied Biosystems). Relative expression was calculated using the comparative Ct method ( $2^{-[\Delta\Delta Ct]}$ )<sup>1</sup>.

Validation was performed using mRNA primers reported in Supplementary Table S1. The expression of cardiogenic markers of Notch target genes was assessed using primers from (Applied Biosystems) (Supplementary Table S1). Individual mature miRNAs were measured using TaqMan MicroRNA single assays (Applied Biosystems) and primer codes were reported in Supplementary Table S1.

### **mRNA array.**

For hybridization experiments, 10 µg of total RNA was used to synthesize double-stranded cDNA (Affymetrix, Santa Clara, CA, USA). After purification double stranded cDNA was used to produce Cr-3-5 labeled cRNA. Microarray analysis was performed in triplicate using the Mouse Genome 430A 2 array (Affymetrix) containing 14,000 genes, according to Affymetrix Expression Analysis technical manual. The results were analyzed using customized script which utilizes Bioconductor packages ([www.bioconductor.org](http://www.bioconductor.org)) based on the R language ([www.r-project.org](http://www.r-project.org)), for quality control analysis, data normalization, hierarchical cluster and identification of differentially expressed transcripts. The mRNA expression level of a transcript is directly related to the signal intensity and can be calculated for each probe set with different methods. Our R-script provides utilization of different Bioconductor packages for data normalization, hierarchical cluster and identification of differentially expressed transcripts. Scanned images were first inspected for quality control (QC) using a variety of built-in QC tools package. QC consisted of visual examination of probe array images, scatter plots from replicates, RNA degradation plots and

*M*APlots was for quality control analysis. Specifically, the *gcrma* package was used for chip normalization and background correction. The *genefilter* package was used to separate genes with high variance according to the interquartile range method (IQR). *samr*-package, significance analysis of microarrays (SAM)<sup>2</sup>, was used for the detection of significantly expressed genes between two groups and to control the false discovery rate (FDR). Briefly, SAM calculates a score for each gene on the basis of the change in expression relative to the standard deviation of all measurements by compute t-statistic for each gene and then performs a set of permutations to determine the false discovery rate by shuffling the class labels (1000 permutations in our analysis). The settings for this analysis were as follows: two-class response. Once the program reported the list of ranked genes, the "delta value" was adjusted to a stringent false discovery rate (FDR%). Function and Pathway Analysis of the modulated genes was performed using Ingenuity Pathways Knowledge Base (version 8.8, Ingenuity Systems) as reference set and assuming direct and indirect relationships. A Fisher's exact test p-value < 0.05 was deemed as statistically significant.

#### **miRNA array.**

Two-color hybridization was performed with total RNA extracted for mRNA studies, using miRCURY LNA microRNA Arrays (v.10.0, EXIQON). The obtained data were analyzed using the Limma package from the Bioconductor Project, subjecting the arrays to locally weighted scatter plot smoothing (Loess). miRNAs with spots showing less than 1.5 times median signal intensity were not considered for subsequent analysis. Modulated miRNAs were validated by qPCR (Applied Biosystems). Bioinformatic prediction of miRNA target genes was performed using miRonTop<sup>3</sup>. mRNAs displaying reciprocal modulation to miR-208b in BZ and to miR-301a in the IA were analyzed using MiRonTop algorithm, looking for direct binding predictions.

## SUPPLEMENTARY REFERENCES

1. Livak KJ, Schmittgen TD (2001) Analysis of relative gene expression data using real-time quantitative PCR and the 2(-Delta Delta C(T)) Method. *Methods*; **25**: 402-408
2. Tusher VG, Tibshirani R, Chu G (2001) Significance analysis of microarrays applied to the ionizing radiation response. *Proc. Natl. Acad. Sci. U. S. A.*; **98**: 5116-5121
3. Le Brigand K, Robbe-Sermesant K, Mari B, Barbry P (2010) MiRonTop: mining microRNAs targets across large scale gene expression studies. *Bioinformatics*; **26**: 3131-3132
