# Supplementary material
Source: PubMed Central journal article supplement (PMC3808142)
Supplement: mt2013137x2.pdf [file mt2013137x2.pdf]

## Supplementary Table S1

| Accession No. | Gene     | Forward Primer             | Reverse primer           |
|---------------|----------|----------------------------|--------------------------|
| NM_010849     | Myc      | AGCTGAAGCGCAGCTTTTTT       | GGCCTTTTCGTTGTTTTCCA     |
| NM_020510     | Fzd2     | TCCGCATCCGCACCAT           | CCATGAGCCTCTCCAGCTTCT    |
| NM_010928     | Notch2   | AAATGAACCAAAGGTGTTTCAGTGTT | CATTCAACGCGCTGGTTAAA     |
| U43691        | Notch4   | TGTGGGCGAATTGGGTGTA        | GCAGTAGATAGCAGAGGCTCCTTT |
| NM_009519     | Wnt11    | TTCCAGGCTGCTCCAAGAA        | ATTCCAGAAAGCCGGTCTTTC    |
| NM_010851     | Myd88    | TGGGCTACATGAGAGCCTACCT     | ACAGTGCCCCCAGATTTTCC     |
| NM_008416     | JunB     | CAGCTCAAGCAGAAGGTCATGA     | GGGCAAGGGAGGCTCTCA       |
| NM_010588     | Jagged-1 | CTTTCACCCTCATCGTGA         | TCAGCAGCTCCTCATCTGG      |

| Gene/miR       | Assay ID       |
|----------------|----------------|
| TBX5           | Mm00803521_m1  |
| Tie-2          | Mm00443242_m1; |
| sm-MHC         | Mm00443013_m1  |
| GAPDH          | Mm99999915_g1  |
| Hes1           | Mm01342805_m1  |
| Hey1           | Mm00468865_m1  |
| Jagged-1       | Mm00496902_m1  |
| Notch1         | Mm00435245_m1  |
| miR-16         | 000391         |
| hsa-mir-208b   | 002290         |
| hsa-mir-301a   | 000528         |
| hsa-mir-483-5p | 002338         |
| mmu-mir-675-5p | 001940         |
| hsa-mir-711    | 001646         |
| mmu-mir-882    | 002610         |
| mmu-mir-204    | 000508         |
